# Supplementary figures and images for: Intra-specific variation in lichen secondary compounds across environmental gradients on Signy Island, maritime Antarctic
Source: Springer Nature journal article supplement (doi:10.1007/s00300-021-02839-y), 2021-03-30

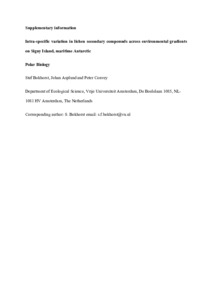

Supplement: MOESM1 [file 300_2021_2839_MOESM1_ESM.pdf]

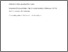

Supplement: MOESM1 [file 300_2021_2839_MOESM1_ESM.pdf]
